# Supplementary material for: Development of Parvifloron D-Loaded Smart Nanoparticles to Target Pancreatic Cancer
Source: PubMed Central journal article supplement (PMC6321128; doi:10.3390/pharmaceutics10040216), 2018-11-04
Supplement: pharmaceutics-10-00216-s001.pdf [file pharmaceutics-10-00216-s001.pdf]

# Supplementary Materials: Development of Parvifloron D-loaded Smart Nanoparticles to Target Pancreatic Cancer

Ana Santos-Rebelo, Catarina Garcia, Carla Eleutério, Ana Bastos, Sílvia Castro Coelho, Manuel A. N. Coelho, Jesús Molpeceres, Ana S. Viana, Lia Ascensão, João F. Pinto, Maria M. Gaspar, Patrícia Rijo and Catarina P. Reis

**Table S1.** NMR data of PvD, (CDCl<sub>3</sub>, 1H 400 MHz, 13C 100 MHz;  $\delta$  in ppm, J in Hz).

| Position   | $\delta_H$     | $J_{H,H}$                      | $\delta_C$ | HSQC |
|------------|----------------|--------------------------------|------------|------|
| 1 $\alpha$ | 1.74 dd        | (1 $\alpha$ , 1 $\beta$ ) 13.0 | 38.37      | t    |
| 1 $\beta$  | 3.76 ddd       | (1 $\alpha$ , 2 $\beta$ ) 11.4 |            |      |
| 2 $\beta$  | 5.59 tt        |                                |            |      |
| 3 $\alpha$ | 1.56 dd        |                                |            |      |
| 3 $\beta$  | 2.15 ddd       |                                | 67.87      | d    |
| 4          | ---            |                                | 45.06      | t    |
| 5          | ---            |                                | 38.58      | s    |
| 6          | 6.41 d         |                                | 164.84     | s    |
| 7          | ---            |                                | 118.69     | d    |
| 8          | 6.79 d         |                                | 139.13     | d    |
| 9          | ---            |                                | 127.45     | s    |
| 10         | ---            |                                | 127.17     | s    |
| 11         | ---            | (1 $\beta$ , 2 $\beta$ ) 4.4   | 43.91      | s    |
| 12         | ---            | (2 $\beta$ , 3 $\alpha$ ) 11.4 | 146.40     | s    |
| 13         | ---            | (2 $\beta$ , 3 $\beta$ ) 4.4   | 178.24     | s    |
| 14         | ---            | (3 $\alpha$ , 3 $\beta$ ) 12.5 | 141.61     | s    |
| 15         | 6.96 d         | (6, 7) 6.9                     | 133.57     | d    |
| Me-16*     | 3.15 sept of d | (15,16(17)) 6.8                | 26.52      | d    |
| Me-17*     | 1.18 d         | (14,15) 0.8                    | 21.84      | q    |
| Me-18      | 1.16 d         | (1 $\beta$ ,3 $\beta$ ) 2.4    | 21.63      | q    |
| Me-19      | 1.29 s         | (2',3';5',6') 8.9              | 33.03      | q    |
| Me-20      | 1.42 s         |                                | 30.58      | q    |
| 1'         | 1.64 s         |                                | 25.52      | q    |
| 2', 6'     | ---            |                                | 122.43     | s    |
| 3',5'      | 7.93 d         |                                | 131.89     | d    |
| 4'         | 6.88 d         |                                | 115.23     | d    |
| 7'         | ---            |                                | 160.58     | s    |
| 4'-OH      | ---            |                                | 166.18     | s    |
| 11-OH      | ~7.70 br       |                                |            |      |
|            | ~7.20 br       |                                |            |      |

**Table S2.** Significant assignments observed on HMBC experiment for PvD.

| <b>Position</b> | <b>HMBC</b>                    |
|-----------------|--------------------------------|
| H-2',6'         | C-7', C-4'                     |
| H-14            | C-7, C-8, C-9, C-12, C-15      |
| H-3',5'         | C-1', C-4'                     |
| H-7             | C-5, C-6, C-8, C-9, C-14       |
| H-6             | C-4, C-5, C-7, C-8, C-10       |
| H-2 $\beta$     | CO-(Ph)                        |
| H-1 $\beta$     | C-2, C-3, C-5, C-20            |
| H-15            | C-12, C-13, C-14, C-16(17)     |
| H-3 $\beta$     | C-1, C-2, C-4, C-5, C-18, C-19 |
| H-1 $\alpha$    | C-2, C-3, C-5, C-9, C-20       |
| H-3 $\alpha$    | C-1, C-2, C-4, C-5, C-18, C-19 |
| Me-20           | C-1, C-5, C-9, C-10            |
| Me-19           | C-3, C-4, C-5, C-18            |
| Me-18           | C-3, C-4, C-5, C-19            |
| Me-16(17)       | C-13, C-15                     |

**Table S3.** IC<sub>50</sub> ( $\mu$ M) values in different time points, 24h and 48h, of different cell lines-cytotoxicity assays.

|             | <b>Ins1-E</b> | <b>MCF7</b> | <b>Caco-2</b> |
|-------------|---------------|-------------|---------------|
| <b>24 h</b> | 21.6          | 35.1        | 32.1          |
| <b>48 h</b> | 20.9          | 34.7        | 31.9          |
